# Supplementary material for: Non-equivalence of anti-Müllerian hormone automated assays—clinical implications for use as a companion diagnostic for individualised gonadotrophin dosing
Source: PubMed Central journal article supplement (PMC5850658; doi:10.1093/humrep/dex219), 2017-06-22
Supplement: figures1.pdf [file figures1.pdf]

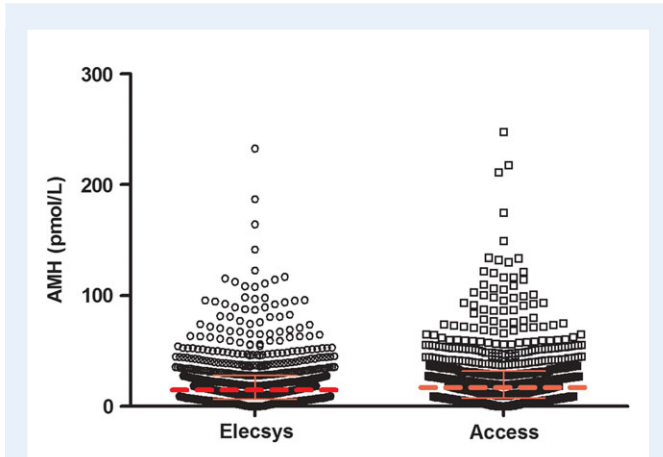

**Figure S1** Distribution of AMH values measured with Elecsys and Access assay. Red lines represent median (dashed line) with interquartile range (solid lines).
