# Supplementary material for: Non-equivalence of anti-Müllerian hormone automated assays—clinical implications for use as a companion diagnostic for individualised gonadotrophin dosing
Source: PubMed Central journal article supplement (PMC5850658; doi:10.1093/humrep/dex219), 2017-06-22
Supplement: supplementaltablesi.pdf [file supplementaltablesi.pdf]

**Supplemental Table S1 Characteristics of included studies**

| Author year                                       | Number of patients | Patient selection                                        | Age range (years) | Assays compared                                                       | Storage                                                              | Sample taken                                                                        | Notes                                                                                                                                                                                                                                                                             |
|---------------------------------------------------|--------------------|----------------------------------------------------------|-------------------|-----------------------------------------------------------------------|----------------------------------------------------------------------|-------------------------------------------------------------------------------------|-----------------------------------------------------------------------------------------------------------------------------------------------------------------------------------------------------------------------------------------------------------------------------------|
| <a href="#">Nelson et al. (2015)</a>              | 83                 | Assisted conception patients                             |                   | Access<br>Elecsys<br>Gen II Assay<br>Ansh Labs                        | -80°C                                                                | Days 2–5 of cycle                                                                   |                                                                                                                                                                                                                                                                                   |
| <a href="#">Li et al. (2016)</a>                  | 265                | Assisted conception patients                             |                   | Access<br>Elecsys<br>Gen II Assay                                     | Fresh -20°C (2 weeks)<br>-80°C (2 weeks)                             | Not documented                                                                      | Diagnostic performance for PCOS also compared.                                                                                                                                                                                                                                    |
| <a href="#">Tadros et al. (2016)</a>              | 211                | Assisted conception patients                             | 24–43             | Access<br>Elecsys<br>Gen II Assay                                     | Frozen thawed samples. No temperature given<br>Frozen for 2–4 months | Days 1–5 of cycle                                                                   | Inclusion Criteria: Both ovaries present with no morphological abnormalities BMI 18–25 kg/m <sup>2</sup><br>Optimum ovarian visualisation at transvaginal sonography                                                                                                              |
| <a href="#">van Helden and Weiskirchen (2015)</a> | 146                | Assisted conception patients PCOS<br>Menopausal patients | 19–53             | Access<br>Elecsys<br>Gen II Assay                                     | -30°C                                                                | Days 2–4 of cycle                                                                   | Simultaneous AFC by transvaginal sonography                                                                                                                                                                                                                                       |
| <a href="#">Pigny et al. (2016)</a>               | 95                 | PCOS                                                     | 18–35             | Access<br>Elecsys<br>Gen II Assay<br>AL-105i<br>ELISAs<br>EAI AMH/MIS | -80°C                                                                | Days 2–5 of cycle (spontaneous or induced with dydrogesterone 10 mg/day for 7 days) | Exclusion criteria: Age <18 or >35<br>Suspicion of low ovarian reserve hyperprolactinaemia<br>nonclassic 21-hydroxylase deficiency<br>Ovarian/Adrenal tumours hypothalamic amenorrhoea follicle >9 mm/serum E <sub>2</sub> > 80 pg/ml<br>Unexplained infertility<br>Endometriosis |
